# Supplementary material
Source: ML conference proceedings conference paper supplement (https://proceedings.neurips.cc/paper_files/paper/2022/hash/f03ce573aa8bce26f77b76f1cb9ee979-Abstract.html)
Supplement: Supplementary file 1 [file f03ce573aa8bce26f77b76f1cb9ee979-Supplemental-Conference.zip]

Archive with 2 entries (2 files):
- GT-GAN_code.zip
- GT-GAN_appendix.pdf
